# Supplementary material for: Perinatal transmission of a probiotic Bifidobacterium strain protects against early life stress-induced mood and gastrointestinal motility disorders
Source: Royal Society of Chemistry journal article supplement (doi:10.1039/d2fo01164f), 2022-01-01

## Supplementary Materials

**Table S1** Primer sequences

| Gene         | Sequences                        |
|--------------|----------------------------------|
| <i>Gapdh</i> | F-5'-TCCTGCACCACCAACTGCT-3'      |
|              | R-5'-GTCAGATCCACGACGGACACA-3'    |
| <i>Nr3c1</i> | F-5'-CCGGGTCCCCAGGTAAAGA-3'      |
|              | R-5'-TGTCCGGTAAAATAAGAGGCTTG-3'  |
| <i>c-fos</i> | F-5'-CGGGTTTCAACGCCGACTA-3'      |
|              | R-5'-TTGGCACTAGAGACGGACAGA-3'    |
| <i>TPH1</i>  | F-5'-AACAAAGACCATTCTCCGAAAG-3'   |
|              | R-5'-TGTAACAGGCTCACATGATTCTC-3'  |
| <i>AQP8</i>  | F-5'-ACACCAATGTGTAGTATGGACCT-3'  |
|              | R-5'-TGACCGATAGACATCCGATGAAG-3'  |
| <i>BNDF</i>  | F-5'-TGCAGGGGCATAGACAAAAGG-3'    |
|              | R-5'-CTTATGAATCGCCAGCCAATTCTC-3' |

**Table S2** Sample size for each experiment

|                          | Male |    |          |    | Female |    |          |    |
|--------------------------|------|----|----------|----|--------|----|----------|----|
|                          | CON  |    | CCFM1025 |    | CON    |    | CCFM1025 |    |
|                          | NS   | MS | NS       | MS | NS     | MS | NS       | MS |
| Forced Swim Test         | 12   | 11 | 7        | 6  | 16     | 16 | 17       | 13 |
| Hippocampus BDNF         | 7    | 6  | 7        | 7  | 7      | 7  | 6        | 7  |
| Hippocampus <i>NR3C1</i> | 6    | 6  | 6        | 8  | 8      | 6  | 5        | 5  |
| Hypothalamus CRH         | 7    | 7  | 7        | 7  | 7      | 7  | 7        | 7  |
| Serum CORT               | 7    | 7  | 7        | 7  | 7      | 7  | 7        | 7  |
| Defecation time          | 10   | 12 | 7        | 9  | 17     | 18 | 17       | 16 |
| Colonic <i>c-Fos</i>     | 7    | 8  | 7        | 7  | 7      | 6  | 8        | 6  |
| Colonic SP               | 7    | 7  | 7        | 7  | 7      | 7  | 7        | 7  |
| Serum ACh                | 7    | 8  | 6        | 7  | 7      | 8  | 7        | 6  |
| Colonic <i>TPH1</i>      | 8    | 8  | 5        | 10 | 6      | 5  | 6        | 5  |
| Colonic Trp              | 7    | 7  | 5        | 6  | 6      | 7  | 6        | 6  |
| Colonic 5-HTP            | 7    | 7  | 5        | 5  | 6      | 7  | 5        | 8  |
| Colonic 5-HT             | 6    | 6  | 4        | 6  | 7      | 8  | 6        | 8  |
| Colonic 5-HIAA           | 7    | 7  | 6        | 6  | 6      | 7  | 6        | 8  |
| Water content of faeces  | 15   | 12 | 13       | 12 | 7      | 7  | 6        | 5  |
| Colonic <i>AQP8</i>      | 8    | 8  | 5        | 10 | 6      | 5  | 6        | 5  |
| Total SCFAs              | 63   | 59 | 46       | 69 | 39     | 36 | 39       | 36 |

**Figure S1** Transcriptional level of hippocampal *bdnf*

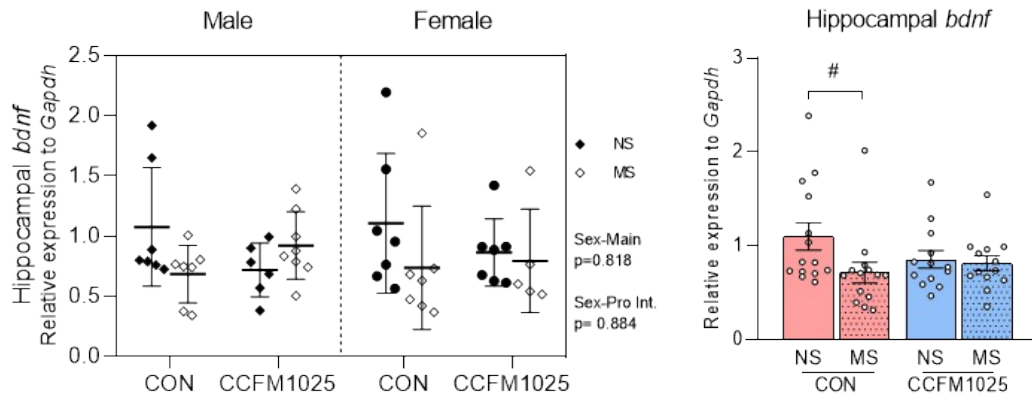

**Figure S2** The concentration of each SCFA

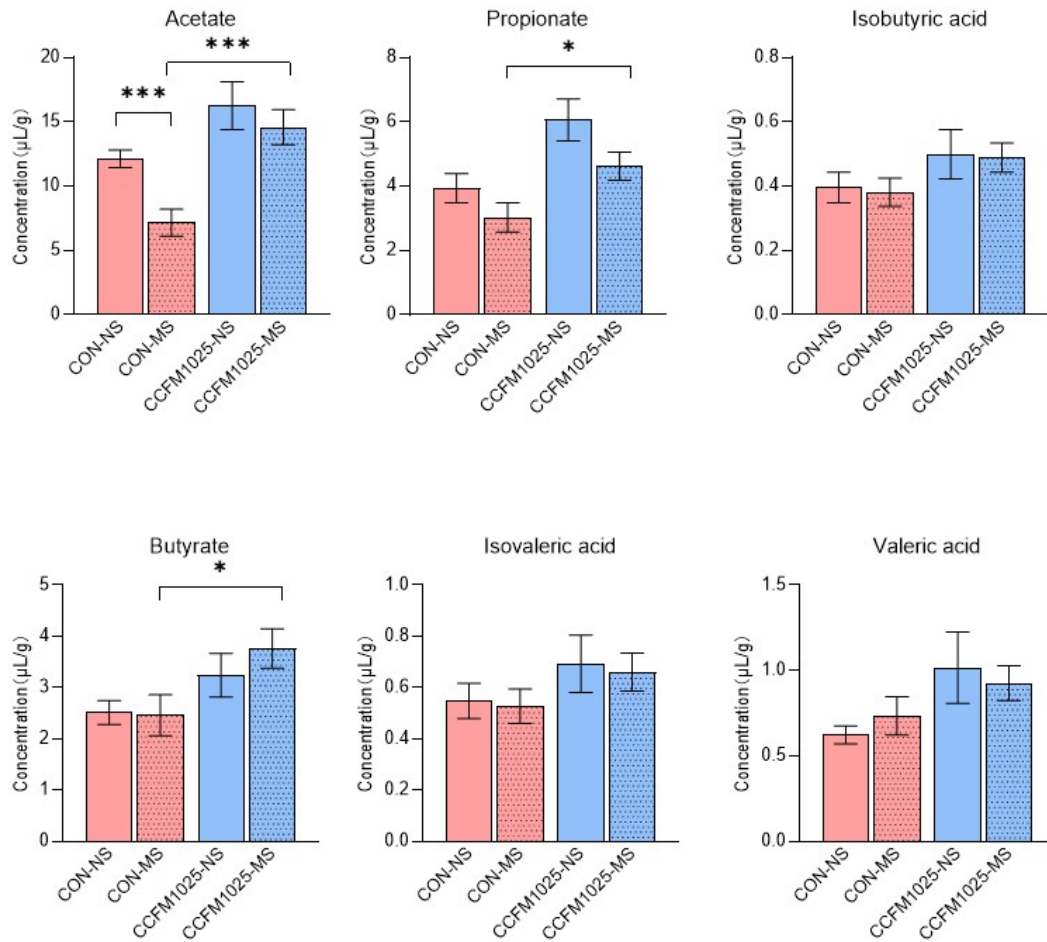

Supplement: d2fo01164f1.pdf [file d2fo01164f1.pdf]
